# Supplementary material for: Neural mechanisms of contextual modulation in the retinal direction selective circuit
Source: PubMed Central journal article supplement (PMC6547848; doi:10.1038/s41467-019-10268-z), 2019-06-03
Supplement: 41467_2019_10268_MOESM1_ESM.pdf [file 41467_2019_10268_MOESM1_ESM.pdf]

## **Supplementary Information**

**Neural mechanisms of contextual modulation in the retinal direction selective circuit**

**Huang et al**

## Supplementary Figure 1

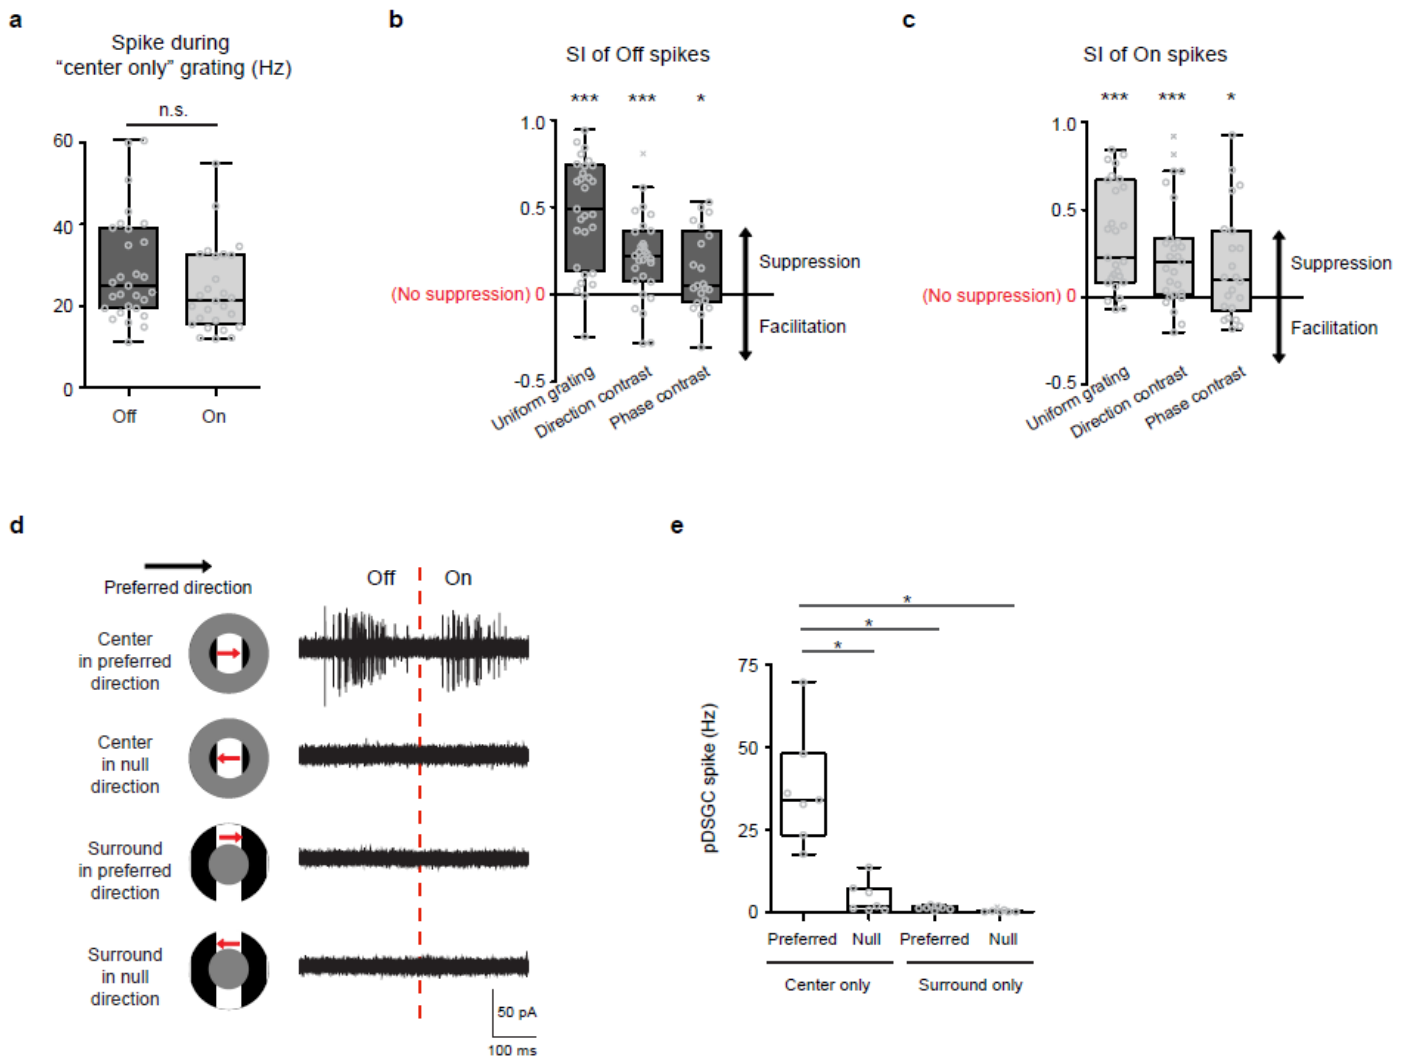

### Supplementary Figure 1. pDSGCs have suppressive RF surrounds.

**a**, Comparison of Off and On spike firing rate during "center only" stimulus. Wilcoxon signed-rank test,  $p = 0.079$ , the same sample groups as Figures 1d and 4b.

**b and c**, Suppression index (SI) of pDSGC Off and On spikes in different motion contexts. Suppression index (SI) of DSGC spiking was calculated as  $(N_{\text{center only grating}} - N_{\text{full-field grating}}) / (N_{\text{center only grating}} + N_{\text{full-field grating}})$ , where  $N$  is the spike firing rate. An SI of 0 indicates no suppression, an SI  $> 0$  indicates surround suppression, and an SI  $< 0$  indicates surround facilitation. Wilcoxon signed-rank test was used to test whether the SI value is significantly higher than 0.

**b**, Off SI, the same sample group as Figure 1d. Wilcoxon signed-rank test was used to test whether the SI of "surround in orthogonal" is significantly higher than 0: uniform grating:  $***p < 0.001$ ; direction-contrast:  $***p < 0.001$ ; phase-contrast:  $*p = 0.033$ .

**c**, On SI, the same sample group as Figure 4b: uniform grating:  $***p < 0.001$ ; direction-contrast:  $***p < 0.001$ ; phase-contrast:  $*p = 0.050$ .

**d and e**, Surround grating alone does not evoke pDSGC spiking regardless of motion directions.

**d**, Left: Schematic diagrams show the “center only” and the “surround only” stimuli. Right: Example spike traces of a pDSGC from a control mouse. Red dashed line shows the boundary of the Off and On spiking.

**e**, Summary of pDSGC spike firing rate under the visual stimuli conditions shown in **c**.  $n = 7$  cells. “Center only” in preferred direction vs the other three stimuli,  $*p = 0.016$ .

## Supplementary Figure 2

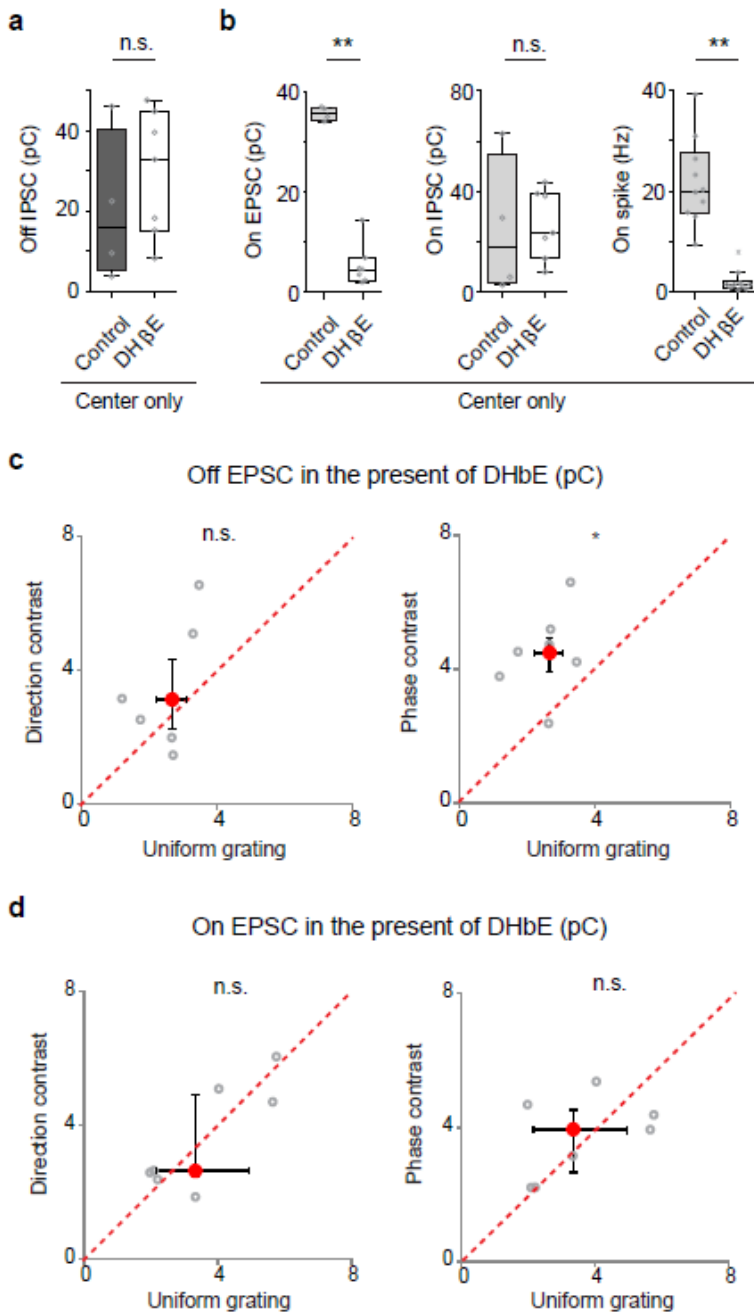

### Supplementary Figure 2. Contextual modulation was not detected in the weak pDSGC responses in the presence of DHβE.

**a**, Summary graph of pDSGC Off inhibitory charge transfer in control (Ames' solution) or in the presence of DHβE: Wilcoxon rank-sum test,  $p = 0.53$ , the same sample group as pDSGC Off excitatory charge transfer in Figure 2d.

**b**, Left: Summary graph of pDSGC On excitatory charge transfer in control (Ames' solution,  $n = 4$  cells from 2 mice) or in the presence of DHβE ( $n = 7$  cells from 2 mice): Wilcoxon rank-sum test,  $** p = 0.0061$ . Middle:

Summary graph of pDSGC On inhibitory charge transfer in control (Ames' solution) or in the presence of DH $\beta$ E: Wilcoxon rank-sum test,  $p = 0.65$ ; the same sample group as pDSGC On excitatory charge transfer on the left. Right: Summary graph of pDSGC On spike firing rate before (in Ames' solution) or after adding DH $\beta$ E:  $n = 10$  cells from 6 mice, Wilcoxon signed-rank test,  $** p = 0.0020$ .

**c**, Scatter plots compare Off EPSC charge transfer between uniform grating and compound gratings in the presence of DH $\beta$ E,  $n = 7$  cells from 2 mice, the same sample group as Figure 2d. Left: Direction-contrast vs uniform grating: Wilcoxon signed-rank test,  $p = 0.2188$ . Right: Phase-contrast vs uniform grating:  $*p = 0.031$ .

**d**, Scatter plots compare On EPSC charge transfer between uniform grating and compound gratings in the presence of DH $\beta$ E,  $n = 7$  cells from 2 mice, the same sample group as Supplementary Figure 2b. Left: Direction-contrast vs uniform grating: Wilcoxon signed-rank test,  $p = 0.8125$ . Right: Phase-contrast vs uniform grating:  $p = 0.94$ .

### Supplementary Figure 3

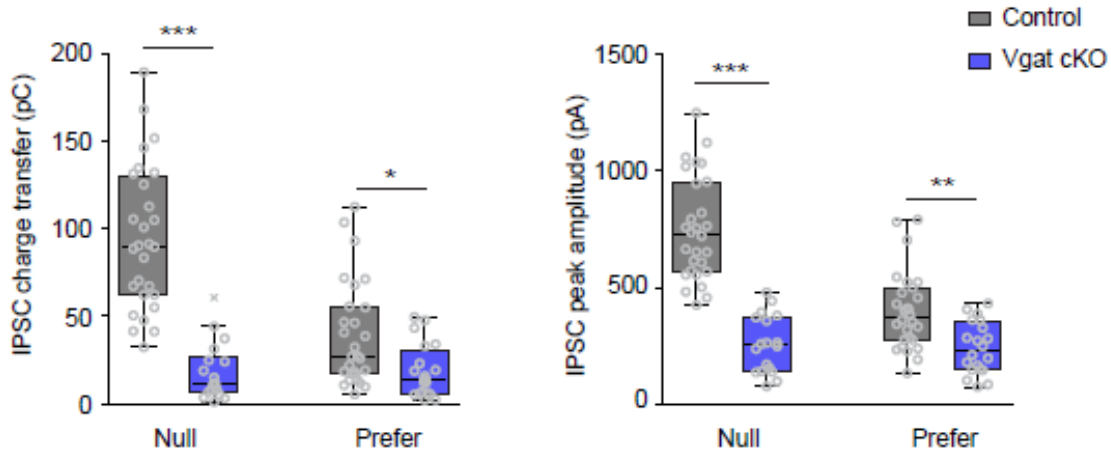

#### Supplementary Figure 3. pDSGC IPSCs are diminished and non-directional in Vgat cKO mice.

Left: Summary of pDSGC IPSC charge transfer during center only gratings in control and Vgat cKO mice. Center gratings moving in null direction: control: n = 28 cells; Vgat cKO: n = 18 cells; Wilcoxon rank-sum test, \*\*\*p < 0.001. Center gratings moving in preferred direction: control: n = 28 cells; Vgat cKO: n = 20 cells; Wilcoxon rank-sum test, \*p = 0.0077.

Right: Summary of pDSGC IPSC peak amplitude during center only gratings in control and Vgat cKO mice. Center gratings moving in null direction: control: n = 28 cells; Vgat cKO: n = 18 cells; Wilcoxon rank-sum test, \*\*\*p < 0.001. Center gratings moving in preferred direction: control: n = 28 cells; Vgat cKO: n = 20 cells; Wilcoxon rank-sum test, \*\*p = 0.0013.

## Supplementary Figure 4

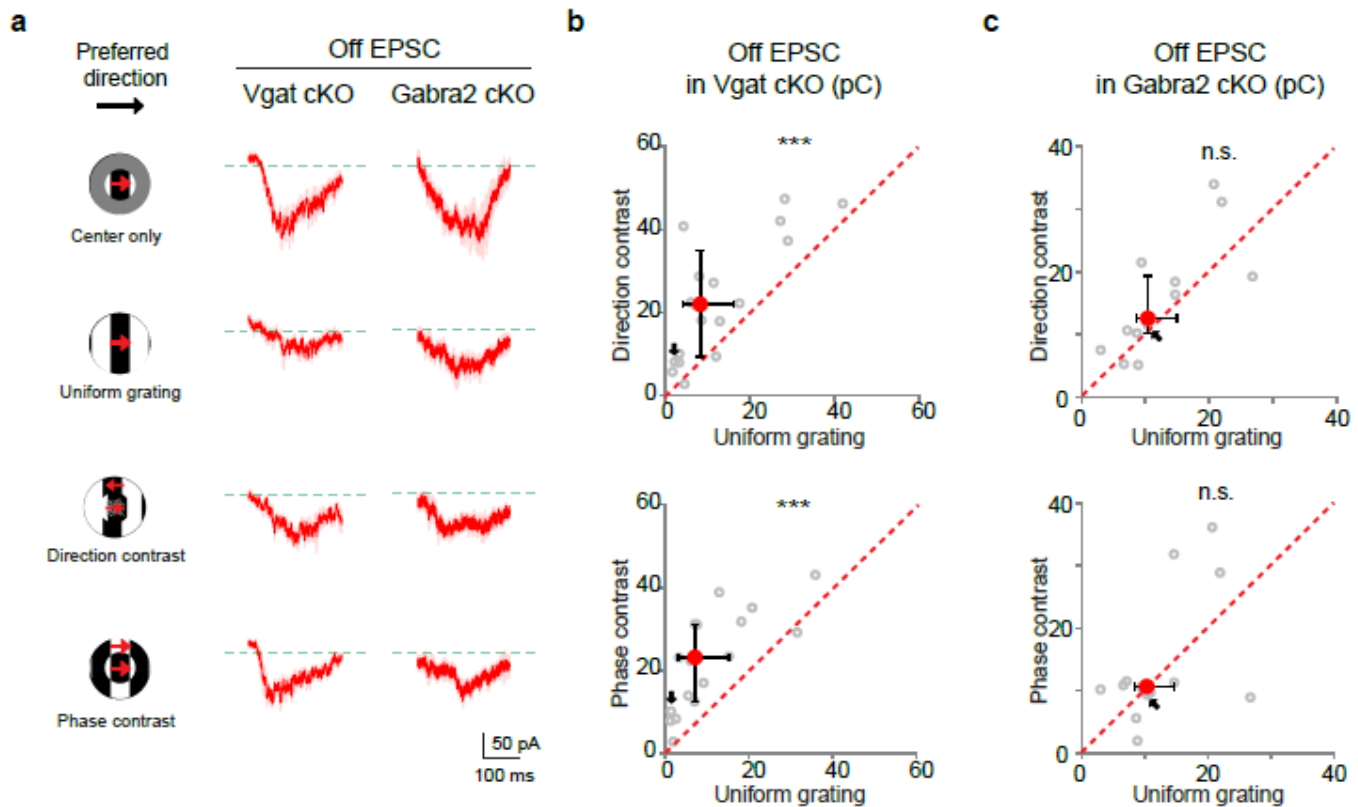

### Supplementary Figure 4. Context-sensitive Off EPSCs of pDSGCs are unaffected in Vgat cKO mice, but disrupted in Gabra2 KO mice.

**a**, Example EPSC traces of a pDSGC from a Vgat cKO mouse or a Gabra2 cKO mice during different grating stimuli.

**b**, Scatter plots of pDSGC Off EPSC charge transfer in Vgat cKO mice. Upper panel: Direction-contrast vs uniform grating:  $n = 18$  cells from 13 mice, Wilcoxon signed-rank test,  $***p < 0.001$ . Lower panel: Phase-contrast vs uniform grating:  $n = 17$  cells from 11 mice, Wilcoxon signed-rank test,  $***p < 0.001$ .

**c**, Same as **b**, but for pDSGC Off EPSC charge transfer in Gabra2 cKO mice. Upper panel: Direction-contrast vs uniform grating:  $n = 13$  cells from 9 mice, Wilcoxon signed-rank test,  $p = 0.0681$ . Lower panel: Phase-contrast vs uniform grating:  $n = 13$  cells from 9 mice, Wilcoxon signed-rank test,  $p = 0.45$ .

## Supplementary Figure 5

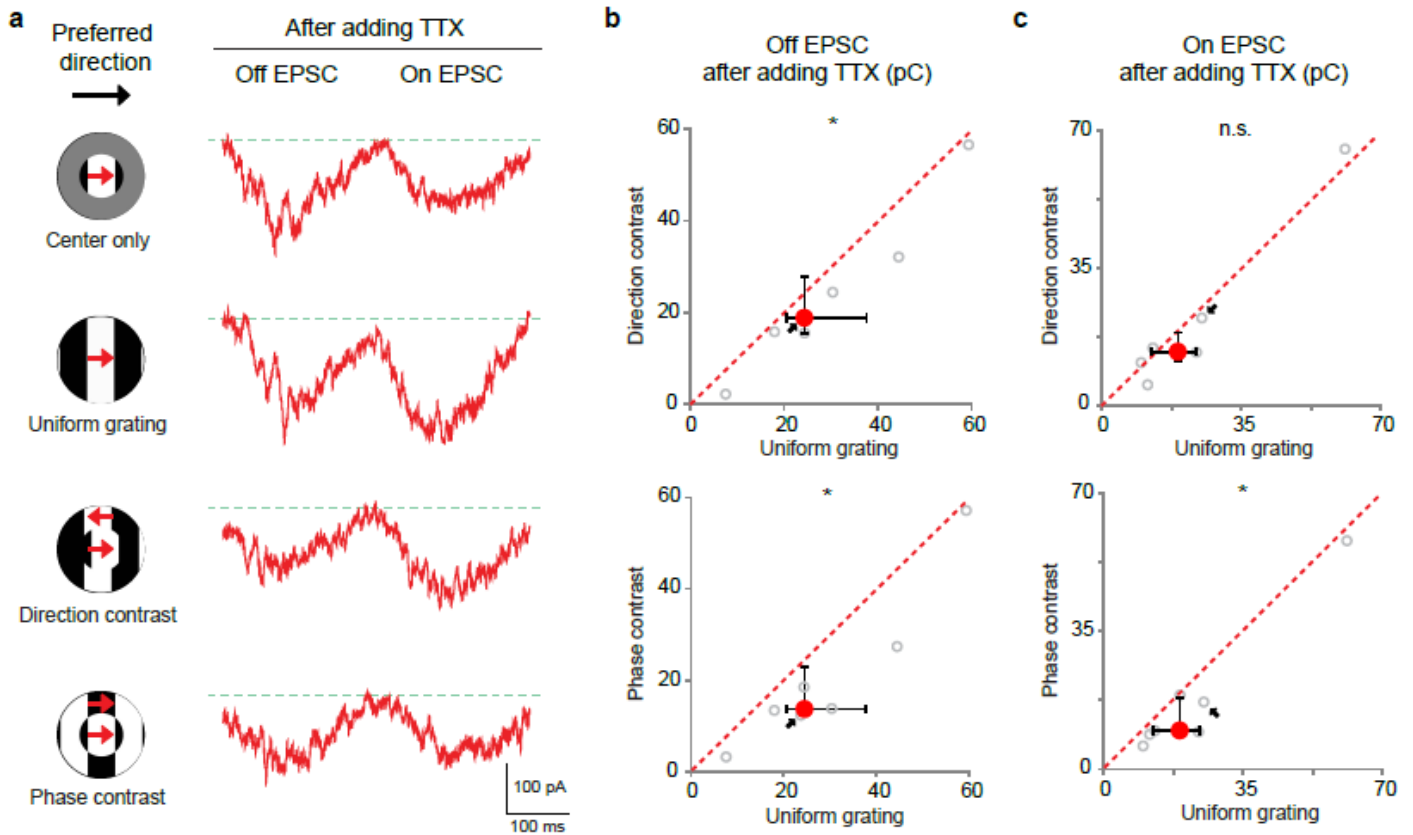

**Supplementary Figure 5. Stronger suppression of pDSGC EPSCs during uniform grating is disrupted or masked in control mice after adding TTX.**

**a**, Example traces of pDSGC EPSCs in bath of TTX.

**b**, Scatter plots of pDSGC Off EPSC charge transfer after applying TTX,  $n = 7$  cells from 2 mice. Upper panel: Direction-contrast vs uniform grating: Wilcoxon signed-rank test,  $*p = 0.016$ . Lower panel: Phase-contrast vs uniform grating: Wilcoxon signed-rank test,  $*p = 0.016$ .

**c**, Same as **b**, but for pDSGC On EPSCs. Upper panel: Direction-contrast vs uniform grating: Wilcoxon signed-rank test,  $p = 0.30$ . Lower panel: Phase-contrast vs uniform grating: Wilcoxon signed-rank test,  $*p = 0.016$ .



## Supplementary Figure 6

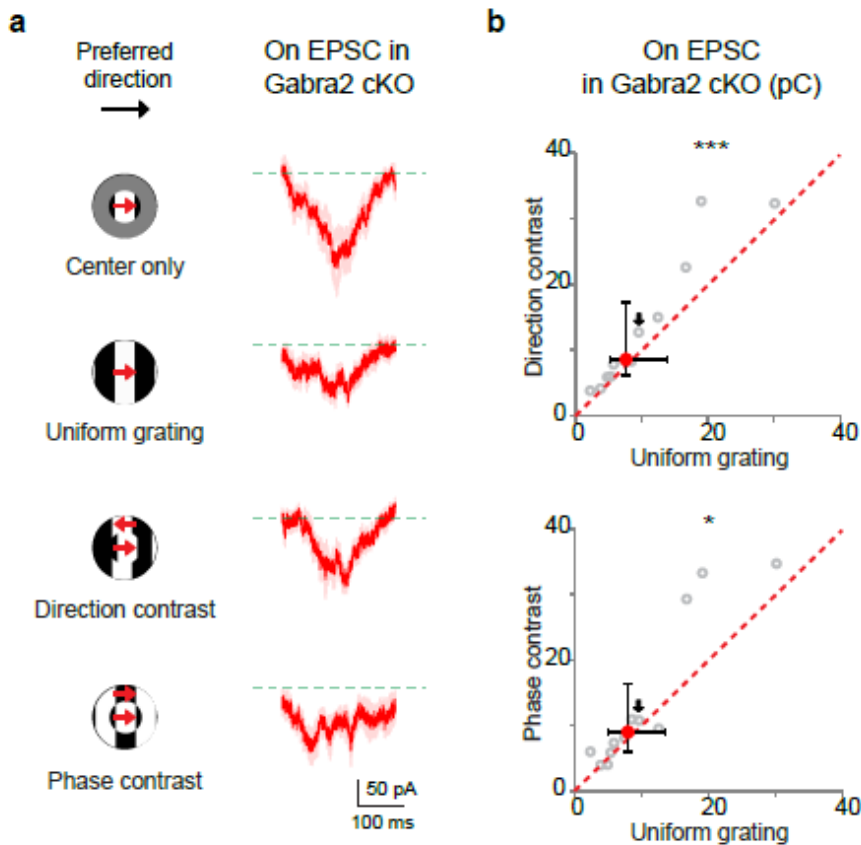

**Supplementary Figure 6. Contextual modulation of pDSGC On EPSCs is unchanged in Gabra2 cKO mice.**

**a**, EPSC traces of a pDSGC from a Gabra2 cKO mouse during different motion contexts.

**b**, Scatter plots of pDSGC On EPSC charge transfer in Gabra2 cKO mice. Upper panel: Direction-contrast vs uniform grating:  $n = 12$  cells from 8 mice, Wilcoxon signed-rank test,  $***p < 0.001$ . Lower panel: Phase-contrast vs uniform grating:  $n = 12$  cells from 8 mice, Wilcoxon signed-rank test,  $*p = 0.034$ .

## Supplementary Figure 7

On SAC IPSC in Vgat cKO (pC)

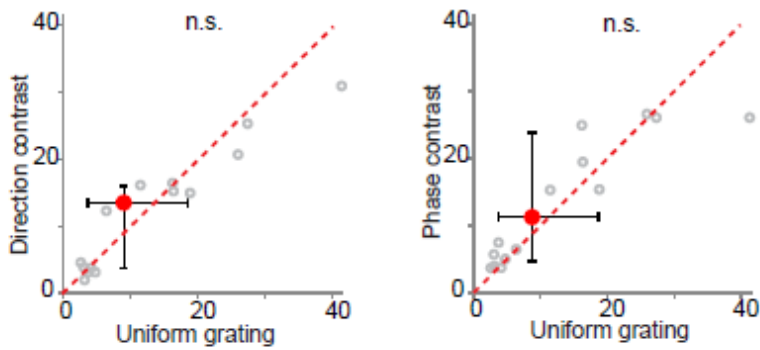

**Supplementary Figure 7. In Vgat cKO mice, IPSC of On SAC during uniform grating is similar to that during compound gratings.**

Scatter plots of On SAC inhibitory charge transfer in Vgat cKO mice,  $n = 14$  cells from 5 mice. Left: Direction-contrast vs uniform grating: Wilcoxon signed-rank test,  $p = 0.36$ . Right: Phase-contrast vs uniform grating: Wilcoxon signed-rank test,  $p = 0.27$ .

## Supplementary Figure 8

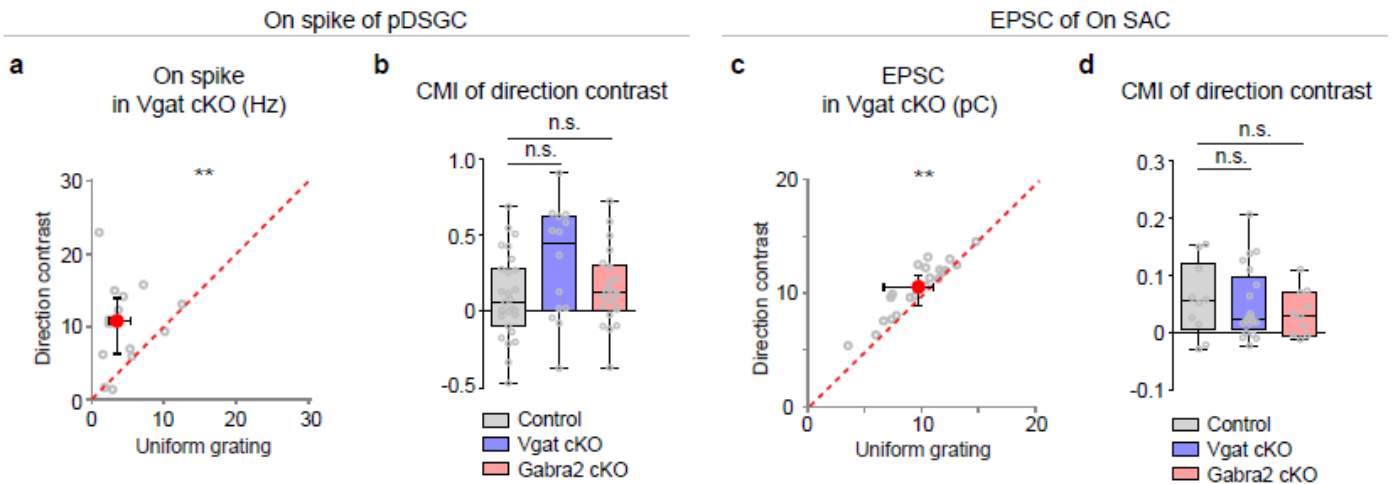

### Supplementary Figure 8. Differential responses during uniform grating and direction-contrast gratings are not significantly enhanced in Vgat cKO mice.

**a**, Scatter plot compares pDSGC On spike firing rate during uniform grating and direction-contrast in Vgat cKO mice:  $n = 14$  cells from 8 mice, Wilcoxon signed-rank test,  $**p = 0.0065$ .

**b**, Summary graph compares CMI of direction-contrast for pDSGC On response in control, Vgat cKO and Gabra2 cKO mice: the same sample group as Figure 4b (control), Supplementary Figure 8a (Vgat cKO) and Figure 5b (Gabra2 cKO), Kruskal-Wallis test,  $p = 0.14$ .

**c**, Scatter plot of On SAC EPSC charge transfer during uniform grating versus direction-contrast grating in Vgat cKO mice:  $n = 21$  cells from 5 mice, Wilcoxon signed-rank test,  $**p = 0.0015$ .

**d**, Summary graph compares CMI of direction-contrast for EPSC charge transfer of On SAC in control, Vgat cKO and Gabra2 cKO mice: the same sample group as Figure 5d (control), Supplementary Figure 8c (Vgat cKO) and Figure 5e (Gabra2 cKO), Kruskal-Wallis test,  $p = 0.80$ .
