# Supplementary material for: Neural mechanisms of contextual modulation in the retinal direction selective circuit
Source: PubMed Central journal article supplement (PMC6547848; doi:10.1038/s41467-019-10268-z), 2019-06-03
Supplement: 41467_2019_10268_MOESM3_ESM.pdf [file 41467_2019_10268_MOESM3_ESM.pdf]

## **Description of Additional Supplementary Files**

File Name: Supplementary Movie 1

Description: Visual stimuli used in this study.
